# Supplementary material for: Synthesis, crystal structures and magnetic properties of mer-cyanideiron(iii)-based 1D heterobimetallic cyanide-bridged chiral coordination polymers
Source: Royal Society of Chemistry journal article supplement (doi:10.1039/c4dt03274h), 2015-01-01
Supplement: c4dt03274h1.pdf [file c4dt03274h1.pdf]

## Support Information

### **Synthesis, Crystal Structures and Magnetic Properties of *mer*- Cyanideiron(III)-Based 1D Heterobimetallic Cyanide-Bridged Chiral Coordination Polymers**

**Daopeng Zhang,<sup>a,b</sup> Shuping Zhuo,<sup>a,\*</sup> Hongyan Zhang,<sup>a</sup> Ping Wang,<sup>a</sup> and  
Jianzhuang Jiang<sup>b,\*</sup>**

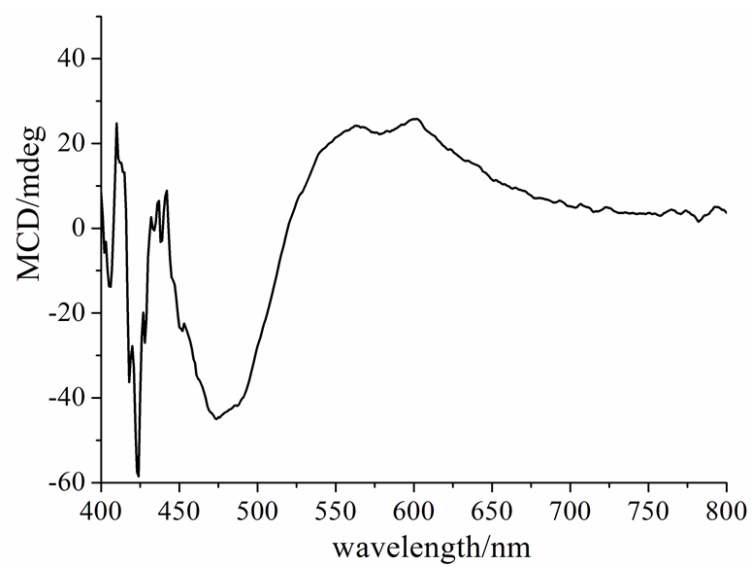

Figure S1. The MCD spectra of complex **1**.

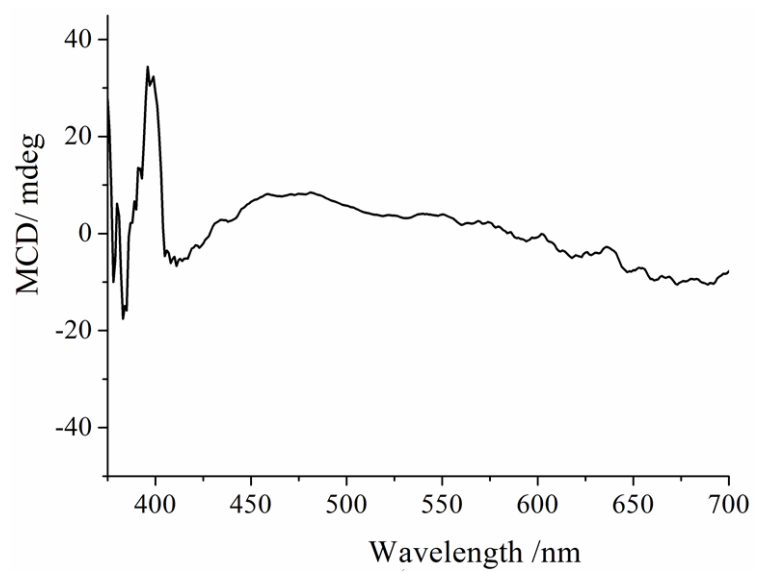

Figure S2. The MCD spectra of complex **3**.

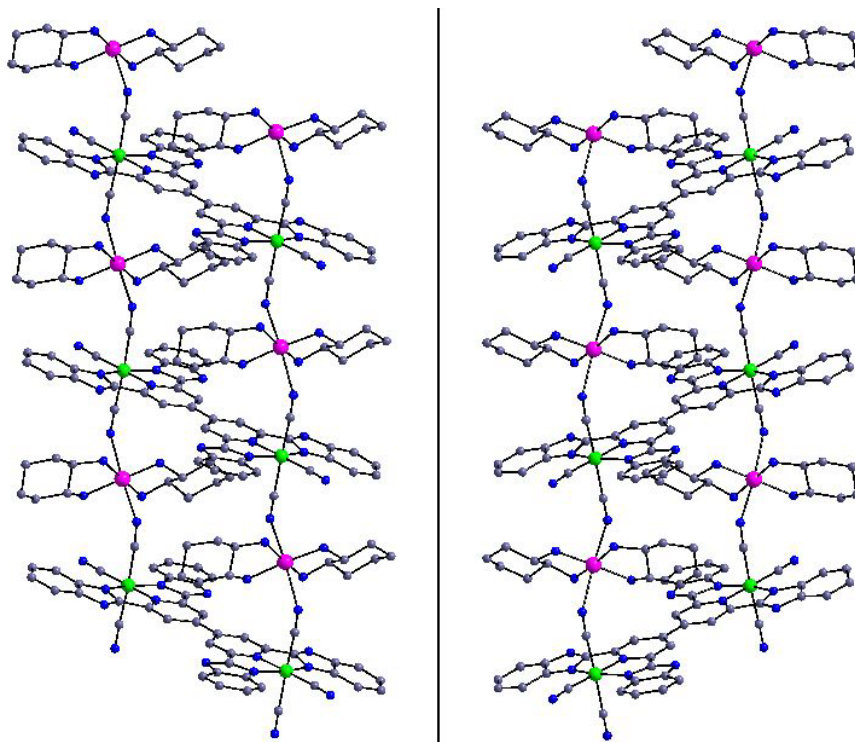

Figure S3. Perspective view of ladder-like double infinite chains of **3** (S,S isomer, left) and **4** (R,R isomer, right), respectively.

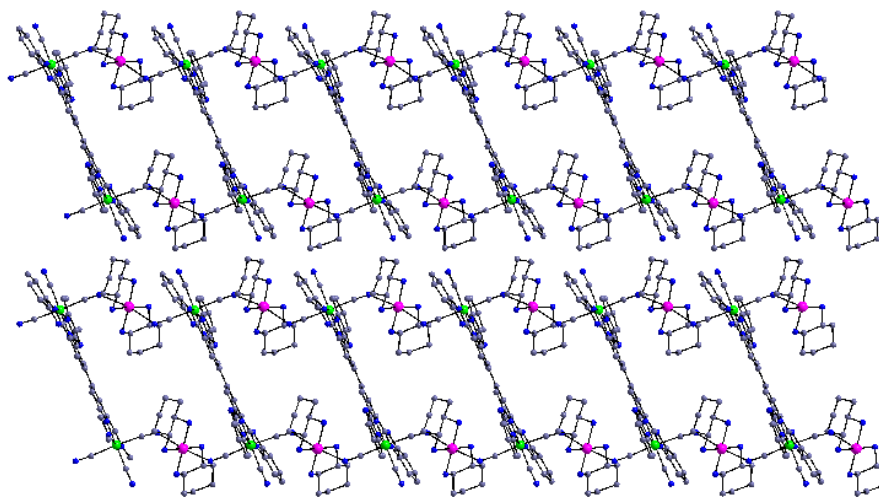

Figure S4. The cell packing diagram along *a* axis for complexes **3** and **4**. All the H atoms and the solvent molecules have been omitted for clarity.

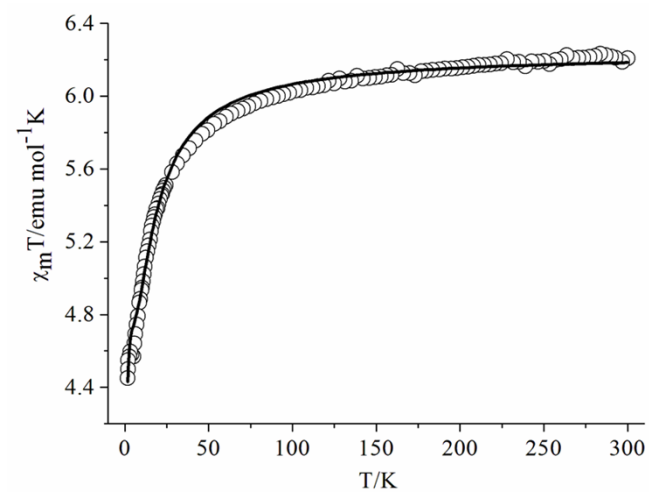

Figure S5. Temperature dependence of  $\chi_M T$  for complex **2**. The fitting results are  $J = -7.44 \text{ cm}^{-1}$ ,  $D = -1.51 \text{ cm}^{-1}$ ,  $g = 1.99$ ,  $R = 1.61 \times 10^{-5}$  (**2**).

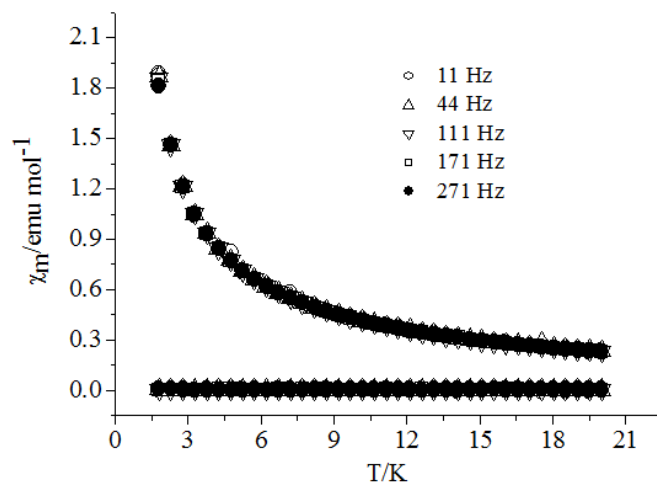

Figure S6. Temperature dependence of ac magnetization of complex **1** in a zero-static field and an ac field of 2 Oe at frequencies of 11, 44, 111, 171 and 271 Hz.

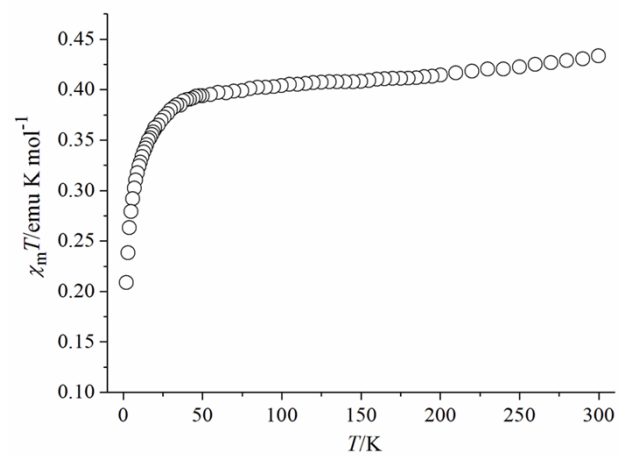

Figure S7. Temperature dependence of  $\chi_M T$  of  $\text{K}_4[\text{Fe}_2(\text{tbbp})(\text{CN})_6]$ .



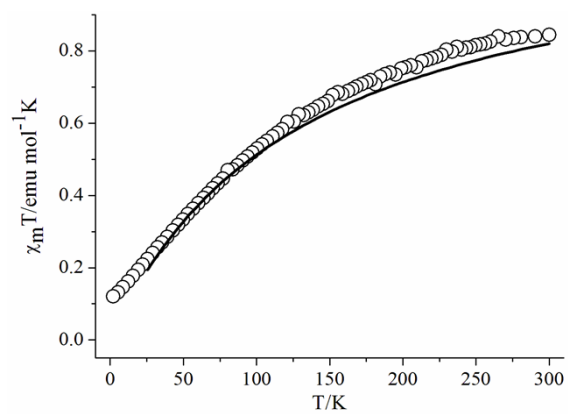

Figure S8. Temperature dependence of  $\chi_M T$  of **4**. The magnetic fitting results are  $J = -4.29 \text{ cm}^{-1}$ ,  $g = 2.08$ ,  $R = 2.65 \times 10^{-4}$  (**4**).

**Table S1.** Selected bond lengths (Å) and angles (°) for complexes **1-2**.

|               | <b>1</b>       | <b>2</b> |
|---------------|----------------|----------|
| Mn1-N1        | 2.319(3)       | 2.277(7) |
| Mn1-N9        | 1.996(3)       | 2.019(7) |
| Mn1-N10       | 2.001(3)       | 1.998(6) |
| Mn1-N15       | 2.263(3)       | 2.280(7) |
| Mn1- O3       | 1.870(2)       | 1.879(5) |
| Mn1-O4        | 1.888(2)       | 1.886(6) |
| Fe1-C1        | 1.961(3)       | 1.962(8) |
| Fe1-C2        | 1.958(3)       | 1.962(9) |
| Fe1-C3        | 1.920(3)       | 1.903(8) |
| Fe1-N4        | 1.940(3)       | 1.962(7) |
| Fe1-N6        | 1.952(3)       | 1.918(7) |
| Fe1-N8        | 1.944(3)       | 1.934(8) |
| N15-Mn1-N1    | 169.44(11<br>) | 168.8(3) |
| Mn1-N1-C1     | 151.5(3)       | 153.9(7) |
| Mn1-N15-C64#1 | 157.1(3)       | 157.4(7) |
| Fe1-C1-N1     | 177.7(3)       | 178.1(7) |
| Fe1-C2-N2     | 178.5(3)       | 175.5(8) |

#1: x+1, y, z

**Table S2.** Selected bond lengths (Å) and angles (°) for complexes **3-4**.

|           | <b>3</b>  | <b>4</b>  |
|-----------|-----------|-----------|
| Cu1-N1    | 2.502(12) | 2.550(10) |
| Cu1-N17   | 1.943(12) | 2.028(11) |
| Cu1-N18   | 1.997(9)  | 1.997(11) |
| Cu1-N19   | 1.976(12) | 2.008(9)  |
| Cu1-N20   | 1.942(13) | 2.010(10) |
| Cu2-N5    | 2.572(10) | 2.528(10) |
| Cu2-N21   | 1.975(14) | 2.052(9)  |
| Cu2-N22   | 2.040(10) | 2.028(10) |
| Cu2-N23   | 2.099(11) | 2.014(10) |
| Cu2-N24   | 2.036(9)  | 2.022(9)  |
| Fe1-C1    | 1.974(15) | 1.977(13) |
| Fe1-C2    | 2.005(13) | 1.974(14) |
| Fe1-C3    | 1.932(11) | 1.953(14) |
| Fe1-N7    | 1.939(9)  | 1.966(9)  |
| Fe1-N9    | 1.967(9)  | 1.947(9)  |
| Fe1-N11   | 1.948(9)  | 1.951(8)  |
| Fe2-C5    | 1.900(14) | 1.986(11) |
| Fe2-C4    | 1.934(12) | 1.905(11) |
| Fe2-C6    | 1.957(13) | 1.948(14) |
| Fe2-N12   | 1.935(8)  | 1.913(9)  |
| Fe2-N14   | 1.919(9)  | 1.960(8)  |
| Fe2-N16   | 1.956(8)  | 1.956(9)  |
| C1-N1-Cu1 | 140.8(9)  | 138.2(9)  |
| C5-N5-Cu2 | 131.7(10) | 134.2(10) |
| C1-Fe1-C2 | 176.3(5)  | 176.9(5)  |
| C5-Fe2-C4 | 176.0(5)  | 179.5(4)  |
